# Supplementary material for: Efficacy, residual effectiveness and safety of diacerein in the treatment of knee osteoarthritis: A meta-analysis of randomized placebo-controlled trials
Source: PubMed Central journal article supplement — Medicine (Baltimore). 2022 Nov 18;101(46):e31700. doi: 10.1097/MD.0000000000031700 (PMC9678537; doi:10.1097/md.0000000000031700), 2022-11-18

Supplemental Digital Content Figure S2. Meta-analyses of diacerein treatment versus placebo or NSAIDs, comparing WOMAC (stiffness) score at the treatment.

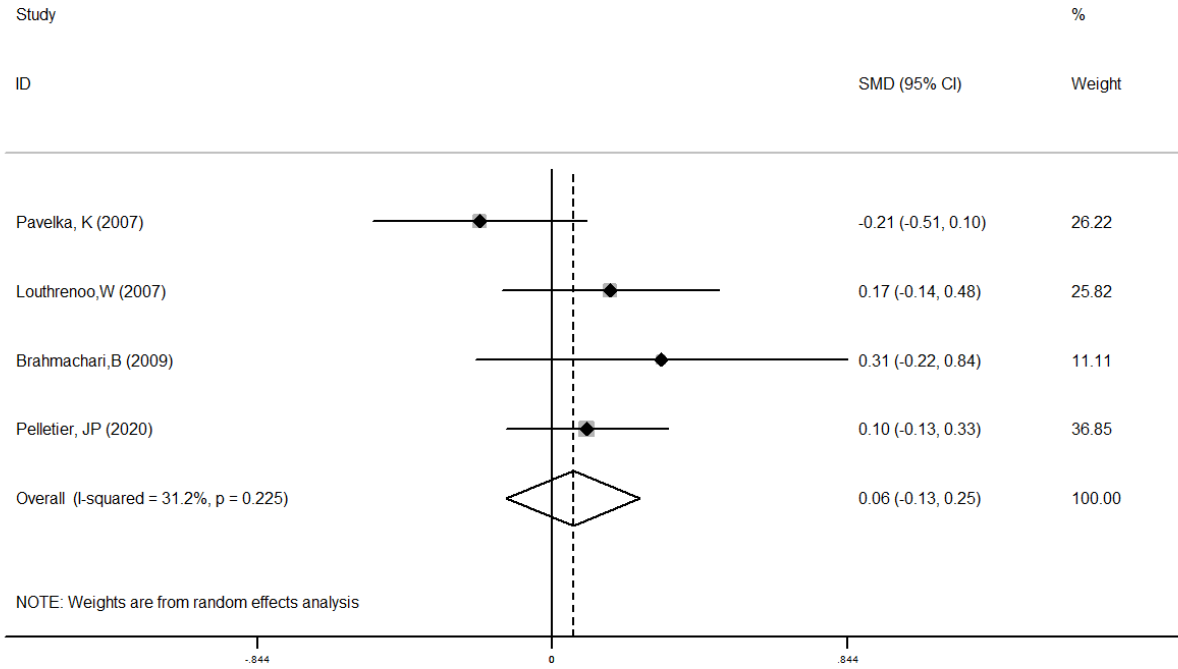

Supplement: medi-101-e31700-s002.pdf [file medi-101-e31700-s002.pdf]
